# Supplementary material for: Gender Role Characteristics and Entrepreneurial Self-Efficacy: A Comparative Study of Female and Male Entrepreneurs in China
Source: Frontiers journal article supplement (doi:10.3389/fpsyg.2020.585803), 2020-12-17
Supplement: Data_Sheet_1.pdf [file Data_Sheet_1.pdf]

## Appendix 2. Gender Role Factor Analysis: EFA Results

|                        |                                     | Rotated Component Matrix <sup>a</sup> |      |      |      |      |       |       |
|------------------------|-------------------------------------|---------------------------------------|------|------|------|------|-------|-------|
|                        |                                     | Component                             |      |      |      |      |       |       |
|                        |                                     | 1                                     | 2    | 3    | 4    | 5    | 6     | 7     |
| Self-government        | Self-made                           | .776                                  |      |      |      |      |       |       |
|                        | Autocratic                          | .765                                  |      |      |      |      |       |       |
|                        | Strong-minded                       | .724                                  |      |      |      |      |       |       |
|                        | Independent                         | .672                                  |      |      |      |      |       |       |
|                        | Be willing to declare               | .655                                  |      |      |      |      |       |       |
| Forthright and Sincere | Compassionate                       |                                       | .785 |      |      |      |       |       |
|                        | Cheerful                            |                                       | .767 |      |      |      |       |       |
|                        | Affectionate                        |                                       | .634 |      |      |      | .357  |       |
|                        | Child-friendly                      |                                       | .517 |      |      | .290 | -.318 | -.320 |
| Friendly               | Childish                            |                                       |      | .752 |      |      |       |       |
|                        | Tender                              |                                       |      | .751 |      |      |       |       |
|                        | Sympathetic                         |                                       | .476 | .575 |      |      |       |       |
|                        | Understanding                       |                                       |      | .565 |      |      |       | .346  |
| Enterprise             | Ambitious                           |                                       |      |      | .807 |      |       |       |
|                        | Aggressive                          |                                       |      |      | .715 |      |       |       |
|                        | Positive                            |                                       |      |      | .552 |      |       |       |
| Power                  | Dominant                            |                                       |      |      |      | .676 |       |       |
|                        | As a leader                         |                                       |      |      |      | .630 |       |       |
|                        | Leadership skill                    | .301                                  |      |      |      | .563 |       | .321  |
| Empathy                | Child-like                          |                                       |      |      |      |      | .738  |       |
|                        | Aspire to placate the Hurt feelings |                                       |      |      |      |      | .637  |       |
|                        | Delicate                            |                                       |      | .336 |      |      | .631  |       |
| Compete                | Kinetic                             |                                       |      |      |      |      |       | .740  |
|                        | Competitive                         |                                       |      |      | .322 |      |       | .632  |
|                        | Analytical                          |                                       |      |      |      | .313 |       | .532  |

<sup>a</sup>. Extraction Method: Principal Component Analysis. Rotation Method: Varimax with Kaiser

Normalization. Rotation converged in 7 iterations. Small coefficients >.03 suppressed.
